# Supplementary material
Source: PubMed Central journal article supplement (PMC3386094)
Supplement: 1121607109_pnas.201121607SI.pdf [file 1121607109_pnas.201121607SI.pdf]

# Supporting Information

Kondo et al. 10.1073/pnas.1121607109

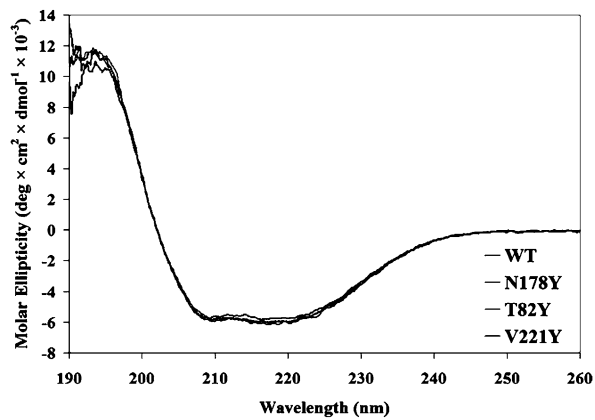

Fig. S1. CD spectra of wild-type *TisAFP* and three mutants that were each tagged with GST. The four similar profiles show that their structural properties are well conserved and that the mutations did not alter the protein fold.

**Table S1. Data collection and refinement statistics for *TisAFP***

| Data collection                          | For SAD phasing      | For refinement        |
|------------------------------------------|----------------------|-----------------------|
| Space group                              |                      | <i>P1</i>             |
| Unit-cell parameters                     |                      |                       |
| ( <i>a</i> , <i>b</i> , <i>c</i> ), Å    | 38.79, 41.60, 70.32  | 38.89, 41.63, 70.25   |
| ( $\alpha$ , $\beta$ , $\gamma$ ), (deg) | 81.56, 83.08, 62.38  | 81.53, 83.13, 62.43   |
| No. molecules/asymmetric unit            |                      | 2                     |
| Beam line                                |                      | SPring-8 BL44B2       |
| Wavelength (Å)                           | 1.7000               | 0.7000                |
| Resolution range (Å)*                    | 20.0–2.2 (2.32–2.20) | 34.0–0.95 (1.00–0.95) |
| Total phi range (deg)                    | 1,800                | 1,800                 |
| $R_{\text{merge}}^{*,\dagger}$           | 0.074 (0.106)        | 0.060 (0.366)         |
| $R_{\text{ano}}^{*,\ddagger}$            | 0.052 (0.076)        |                       |
| Observed reflections                     | 353,597              | 1,988,099             |
| Independent reflections                  | 18,126               | 232,289               |
| Completeness (%)*                        | 92.7 (74.9)          | 95.5 (92.0)           |
| Multiplicity*                            | 19.5 (19.0)          | 8.6 (7.1)             |
| $\langle I/\sigma(I) \rangle^*$          | 11.2 (9.2)           | 7.2 (2.0)             |
| Refinement statistics                    |                      |                       |
| $R$ factor $^{*,\S}$                     |                      | 0.112 (0.165)         |
| Free $R$ factor $^{*,\S,\¶}$             |                      | 0.129 (0.190)         |
| rms bond lengths, Å                      |                      | 0.017                 |
| rms bond angles (deg)                    |                      | 1.851                 |
| Residues                                 |                      | 223 × 2               |
| No. of non-H atoms                       |                      |                       |
| Protein                                  |                      | 3,211                 |
| Solvent                                  |                      | 843                   |
| Ramachandran plot, % $^{\parallel}$      |                      |                       |
| Residues in favored regions              |                      | 98.4                  |
| Residues in allowed regions              |                      | 1.6                   |
| Residues in outlier regions              |                      | 0.0                   |
| Average B factor, Å $^2$                 |                      | 9.5                   |

The diffraction data were processed using HKL2000 (1) and CCP4 (2) program suite. In an attempt to prepare an iodine-labeled crystal, iodine solution was applied for 30 min, followed by additional H<sub>2</sub>O<sub>2</sub> treatment for 30 min. Diffraction data from this crystal, which were collected at 100 K on BL44B2 at the SPring-8 using 2.0000-Å radiation, gave no interpretable solution for phase determination. However, this crystal was found to diffract up to the 0.95-Å resolution using 0.7000-Å radiation, which was applicable to the native dataset. After refinement of the structure, weak electron density due to monoiodination was identified at Y91. Both *TisAFP* molecules in the asymmetric unit contain monoiodotyrosine at this position with low occupancy (0.2). For phase determination, we used the single-wavelength anomalous diffraction (SAD) method using HYPER-VIL procedures (3). The programs SOLVE and RESOLVE (4) were used for the phasing and model building, and CNS (5) and REFMAC5 (6) for structure refinement, respectively.

\*Values in parentheses are for the highest resolution shell.

$^{\dagger}R_{\text{merge}} = \sum_j \langle I(h) \rangle - I(h)_j / \sum_j \langle I(h) \rangle$ , where  $\langle I(h) \rangle$  is the mean intensity of a set of equivalent reflections.

$^{\ddagger}R_{\text{ano}} = \sum [I(+h) - I(-h)] / \sum [I(+h) + I(-h)]$ .

$^{\S}R$  factor =  $\sum |F_{\text{obs}}(h) - F_{\text{calc}}(h)| / \sum |F_{\text{obs}}(h)|$ , where  $F_{\text{obs}}$  and  $F_{\text{calc}}$  are the observed and calculated structure factors, respectively.

$^{\¶}$ A randomly chosen 5.0% of the data were used to calculate the free  $R$  factor (7).

$^{\parallel}$ Statistics were obtained from RAMPAGE (8).

- Otwinowski Z, Minor W (1997) Processing of X-ray diffraction data collected in oscillation mode, *Methods in Enzymology*, 276, Macromolecular Crystallography, part A, 307–326 (Academic, New York).
- Collaborative Computational Project, Number 4 (1994) The CCP4 suite: Programs for protein crystallography. *Acta Crystallogr D Biol Crystallogr* 50:760–763.
- Miyatake H, Hasegawa T, Yamano A (2006) New methods to prepare iodinated derivatives by vaporizing iodine labelling (VIL) and hydrogen peroxide VIL (HYPER-VIL). *Acta Crystallogr D Biol Crystallogr* 62:280–289.
- Terwilliger T (2004) SOLVE and RESOLVE: Automated structure solution, density modification and model building. *J Synchrotron Radiat* 11:49–52.
- Brünger AT, et al. (1998) Crystallography and NMR system: A new software suite for macromolecular structure determination. *Acta Crystallogr D Biol Crystallogr* 54:905–921.
- Murshudov GN, Vagin AA, Dodson EJ (1997) Refinement of macromolecular structures by the maximum-likelihood method. *Acta Crystallogr D Biol Crystallogr* 53:240–255.
- Brünger AT (1992) Free R value: A novel statistical quantity for assessing the accuracy of crystal structures. *Nature* 355:472–475.
- Lovell SC, et al. (2002) Structure validation by  $C_{\alpha}$  geometry:  $\psi/\phi$  and  $C_{\beta}$  deviation. *Proteins* 50:437–450.
